# Supplementary material
Source: Springer Nature journal article supplement (https://www.springermedizin.de/resource/supplementary/12969_2011_794_MOESM2_ESM.pdf/9593036)

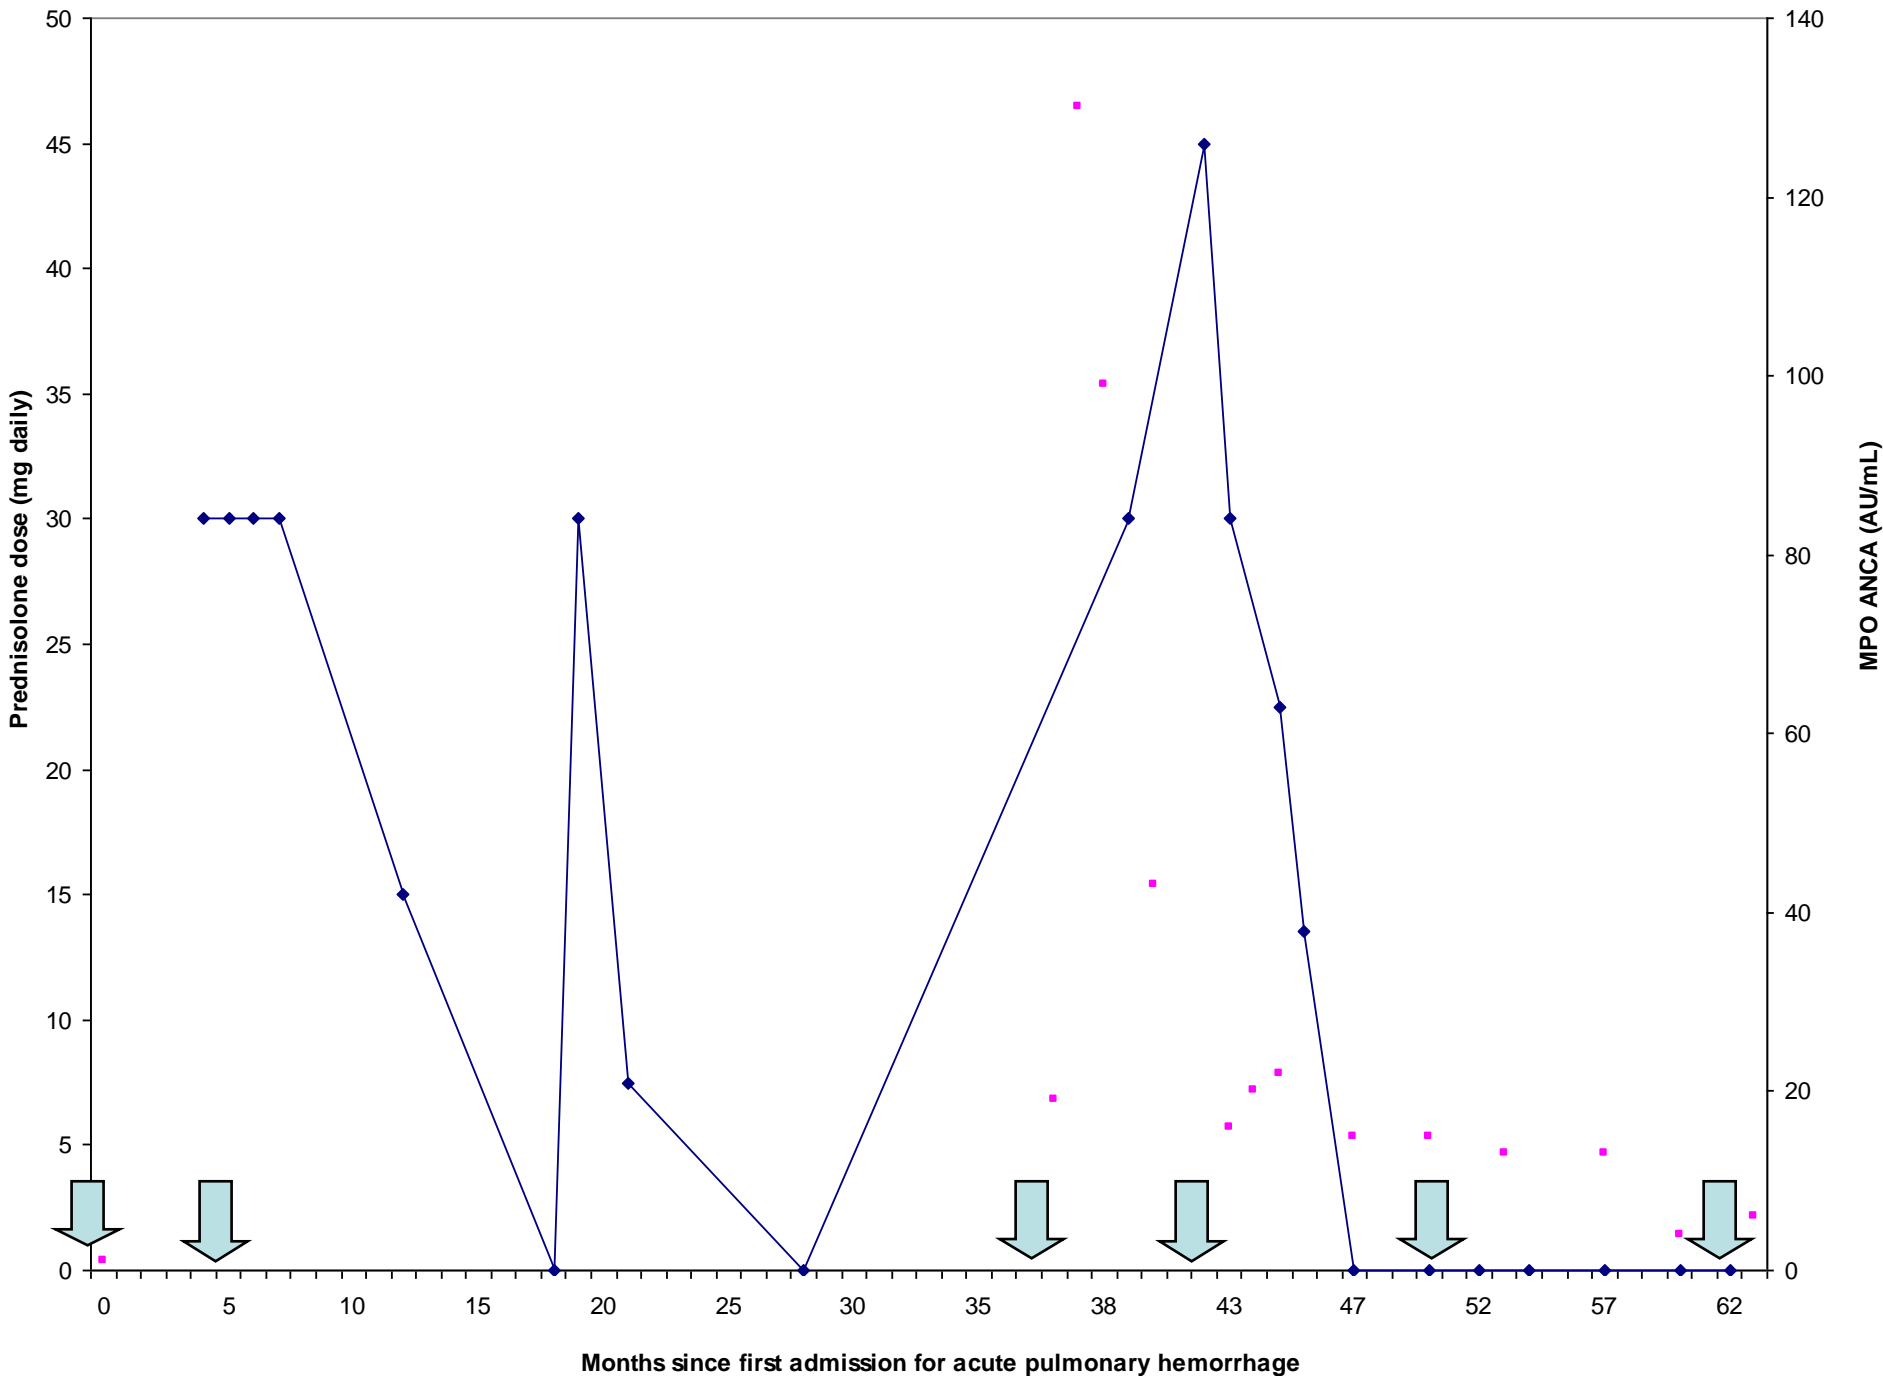

Supplement: MOESM2 [file 9593036]
